# Supplementary material
Source: PubMed Central journal article supplement (PMC3244876)

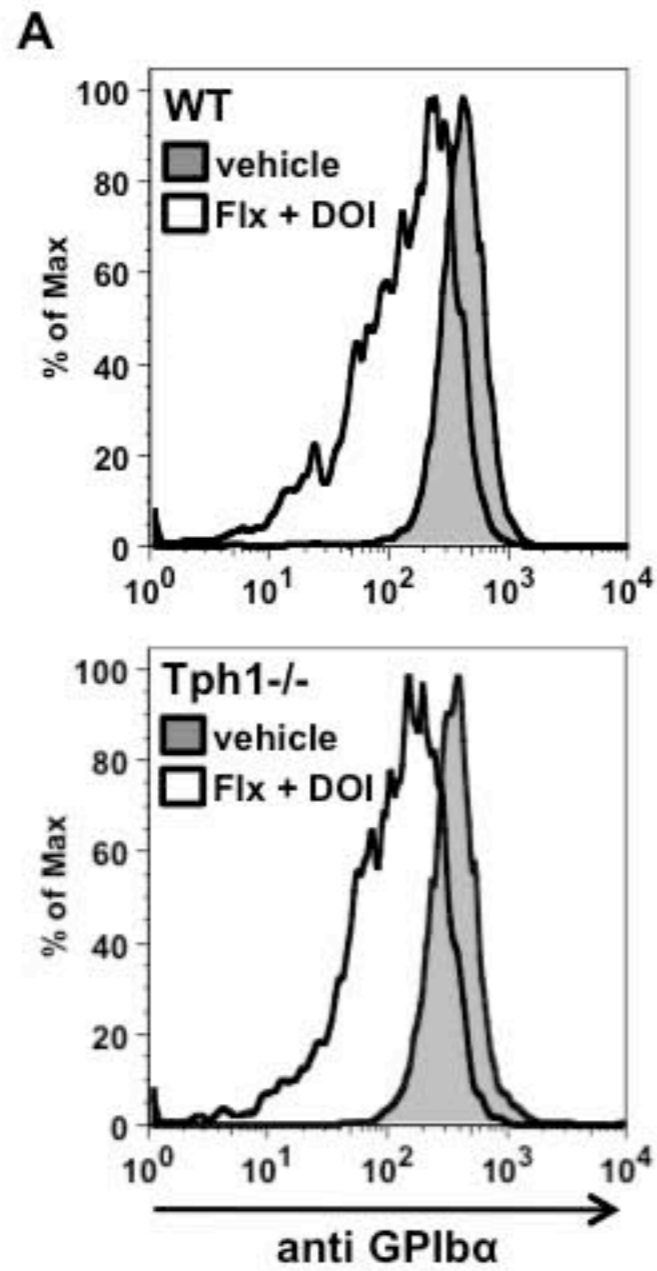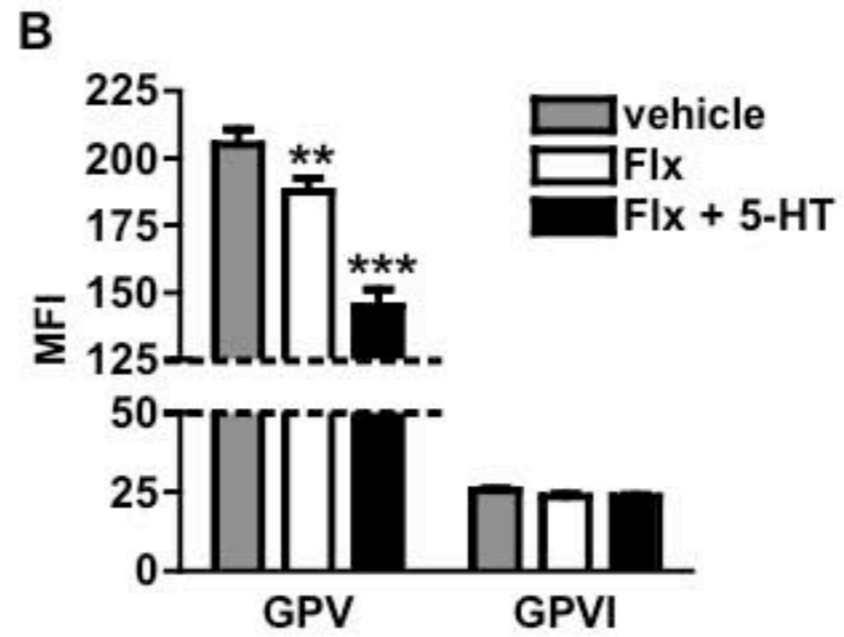

Supplement: NIHMS343906-supplement-Fig__S1.pdf [file NIHMS343906-supplement-Fig__S1.pdf]
